# Supplementary figures and images for: Transient Enlargement in Meningiomas Treated with Stereotactic Radiotherapy
Source: MDPI journal article supplement (doi:10.3390/cancers14061547), 2022-03-17

**Figure S1:** Measured tumor volumes over time for all patients

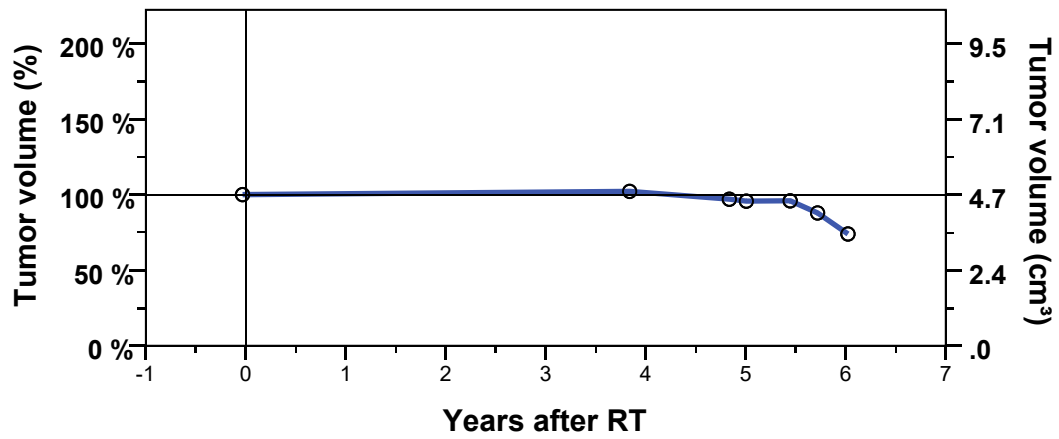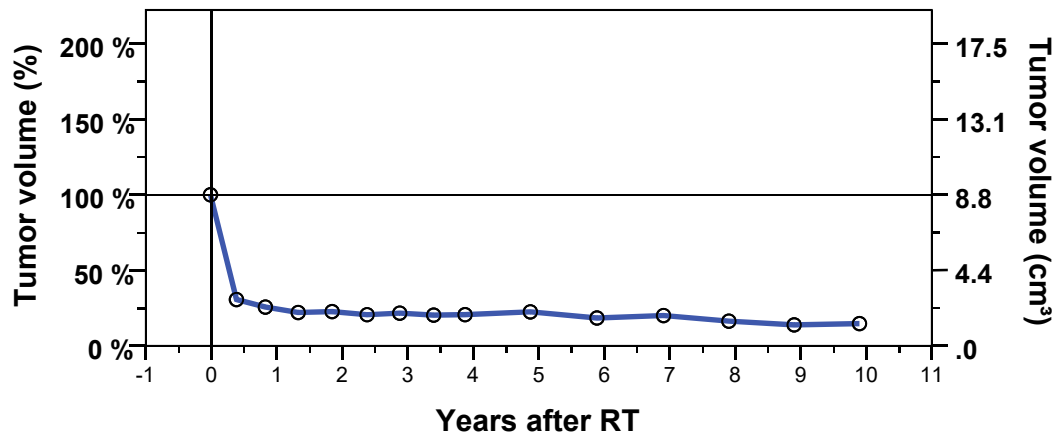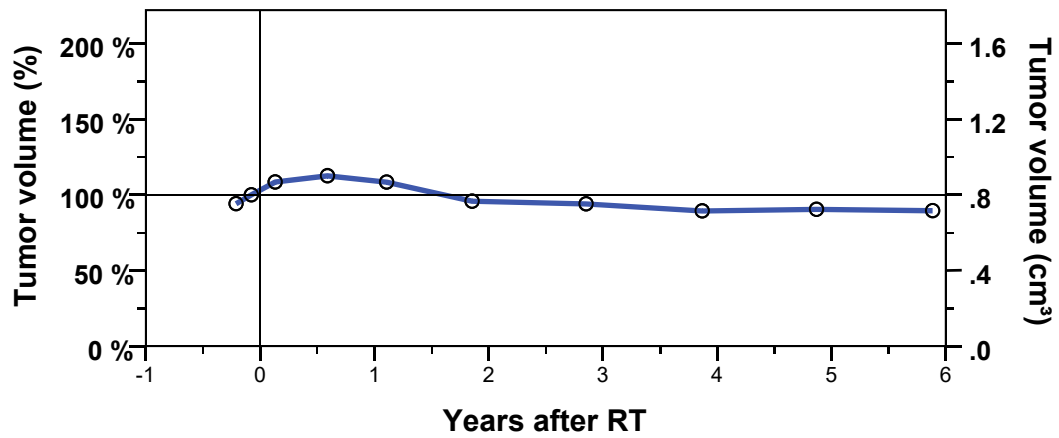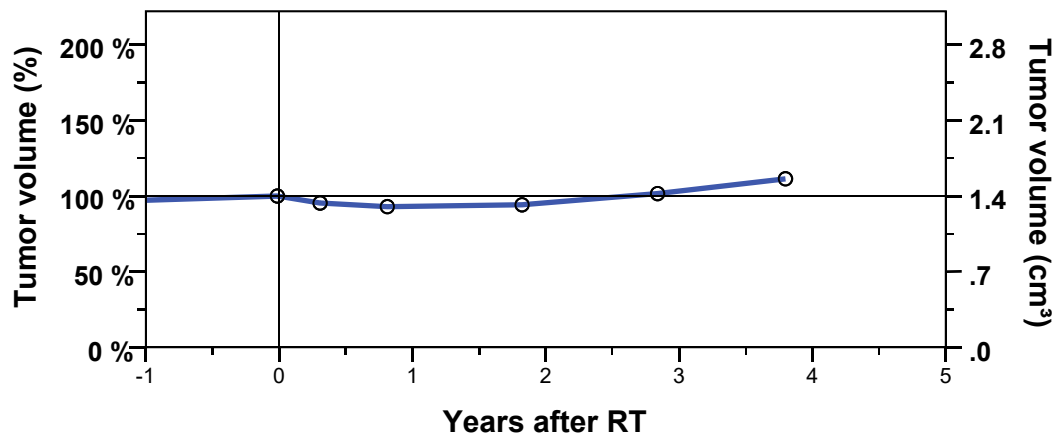

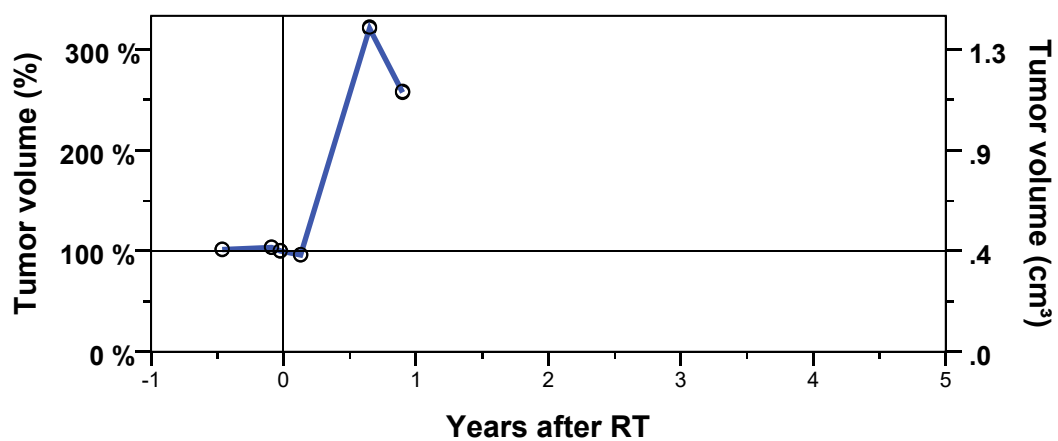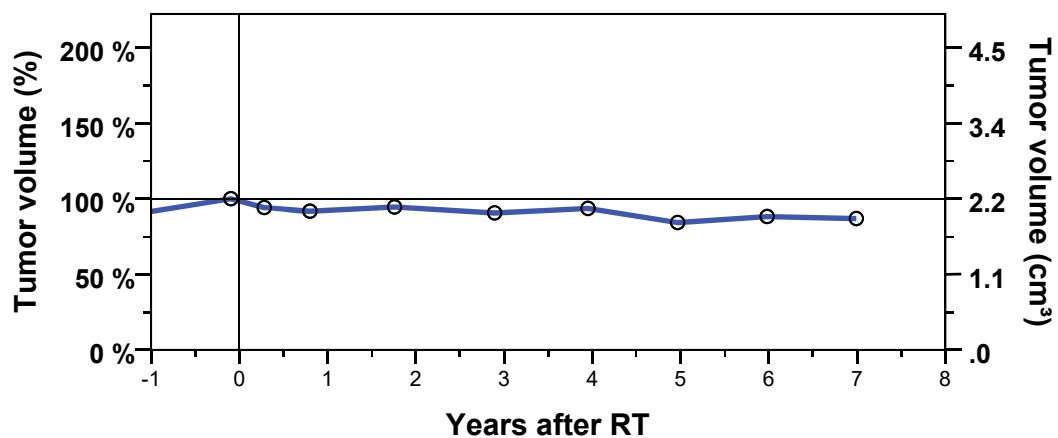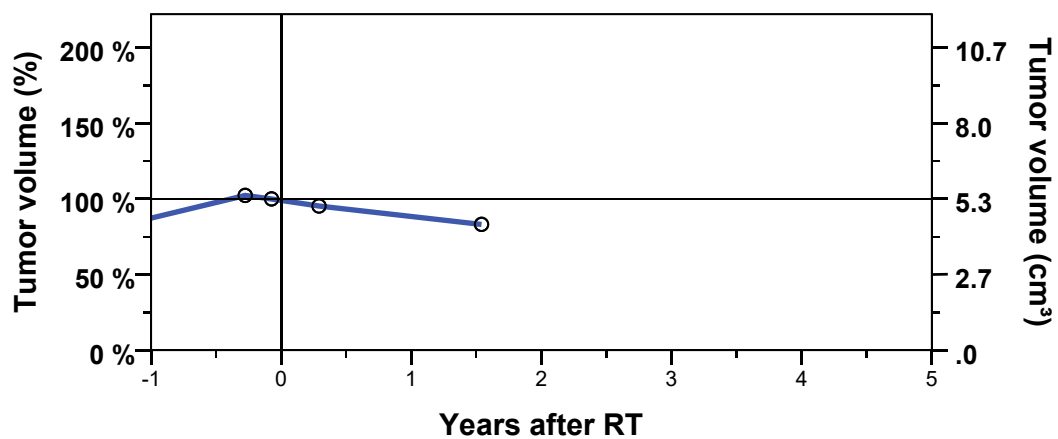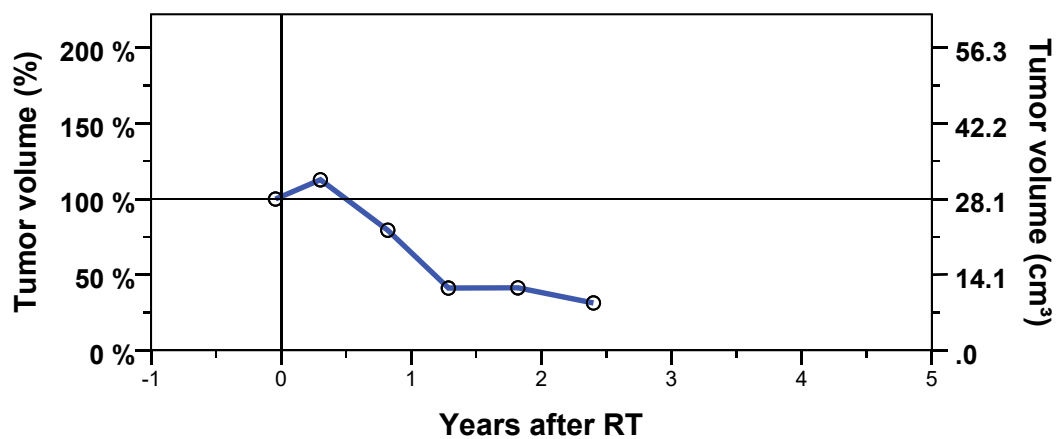

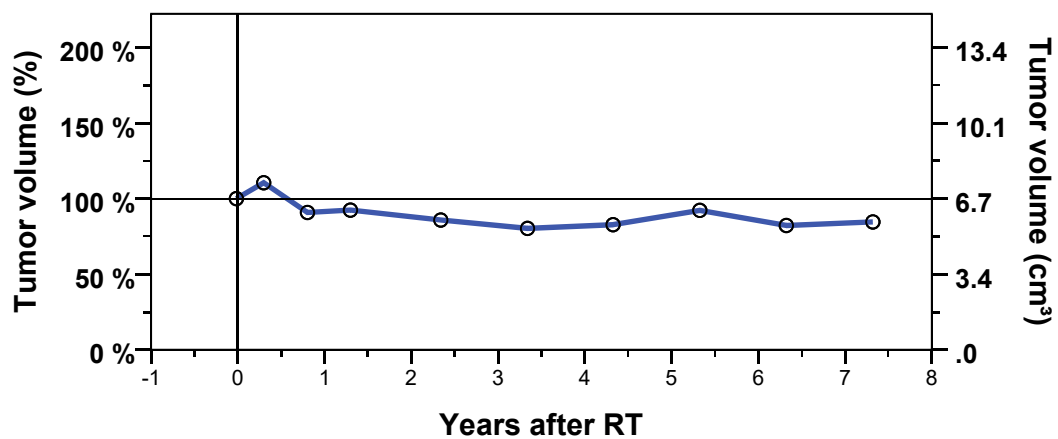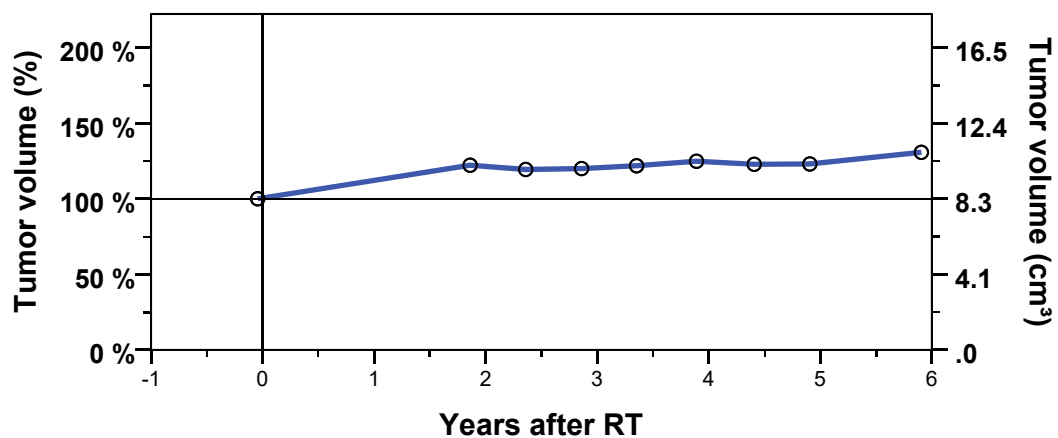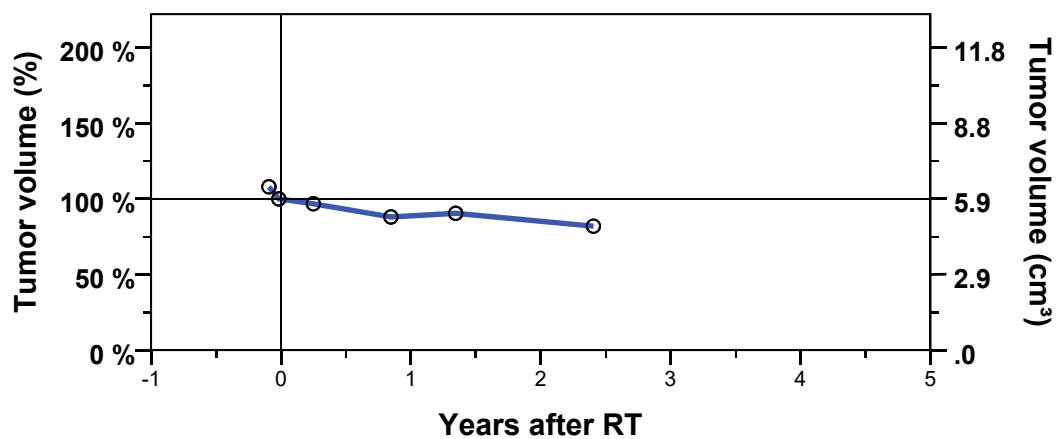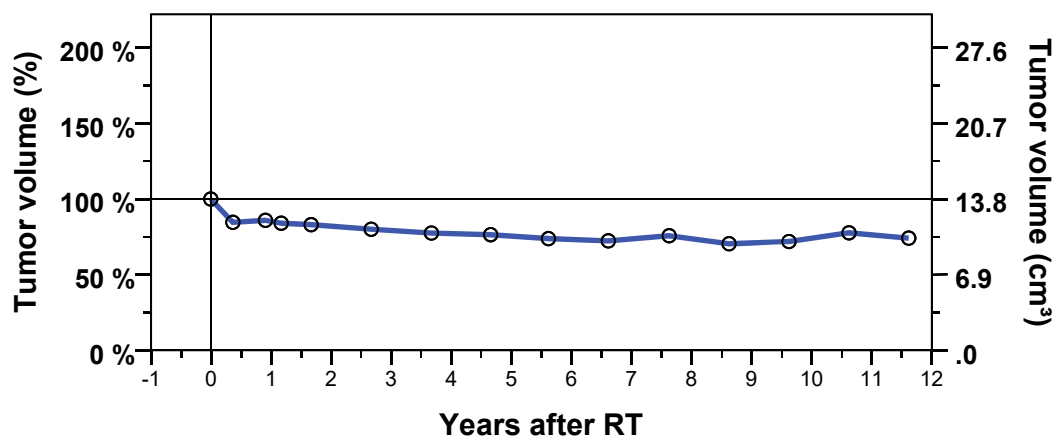

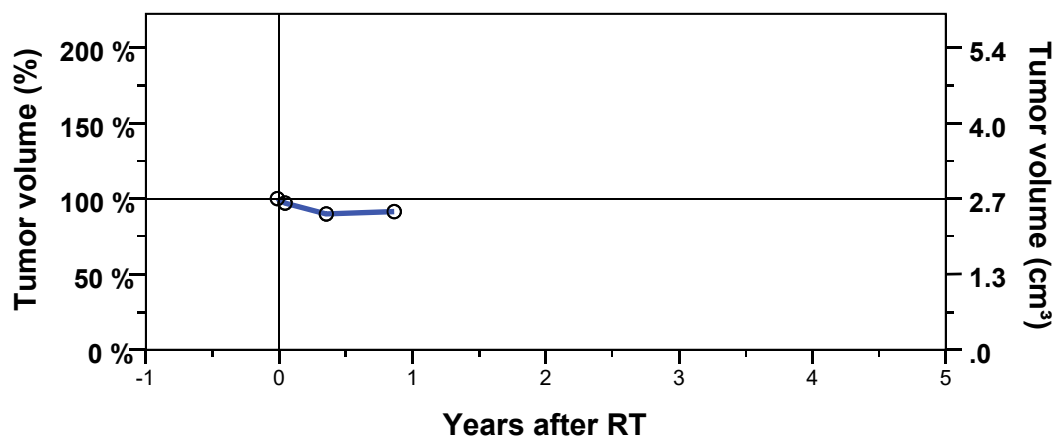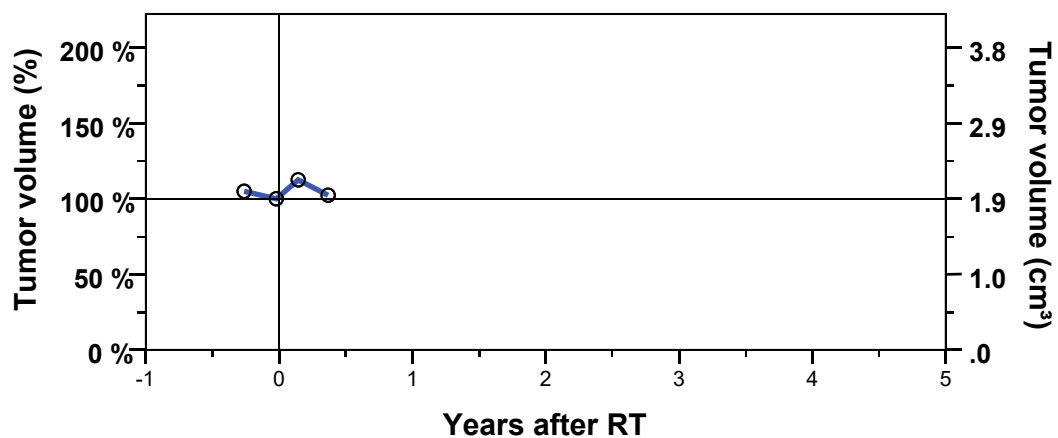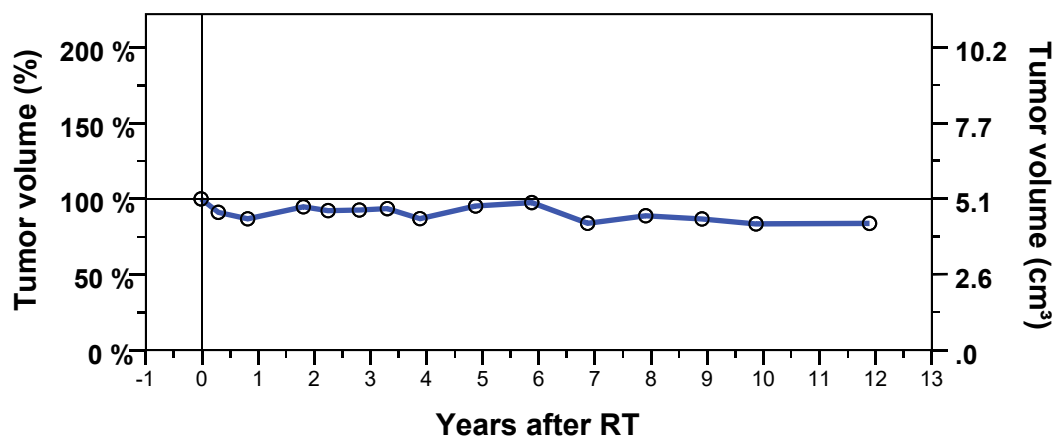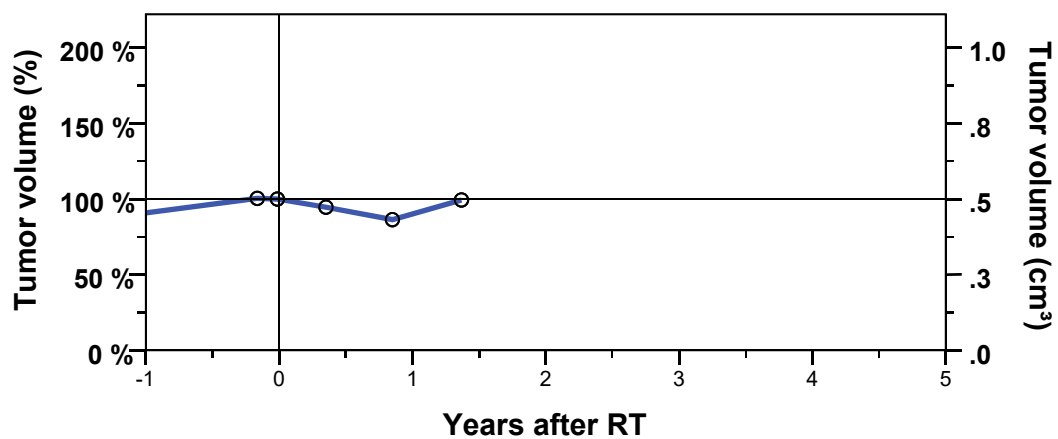

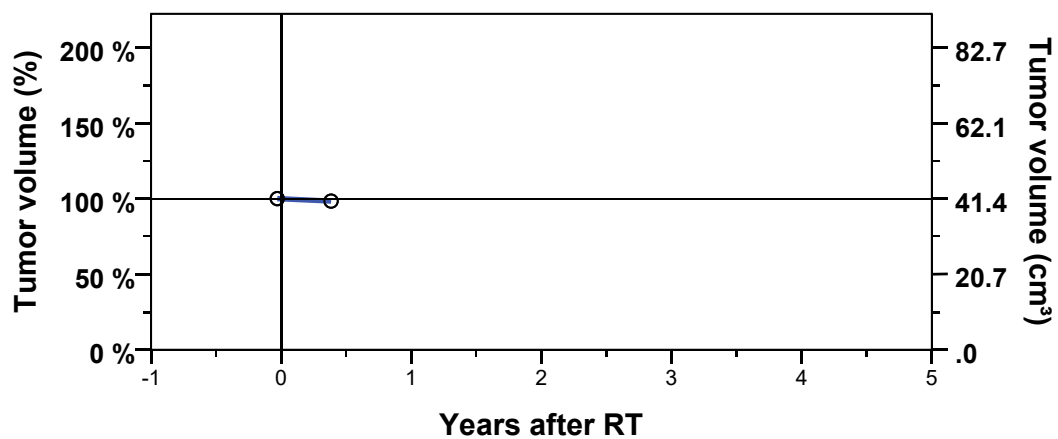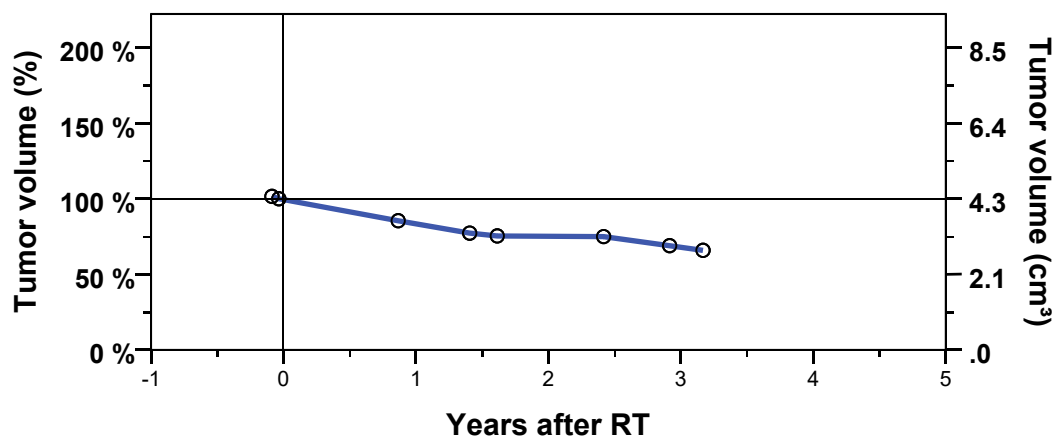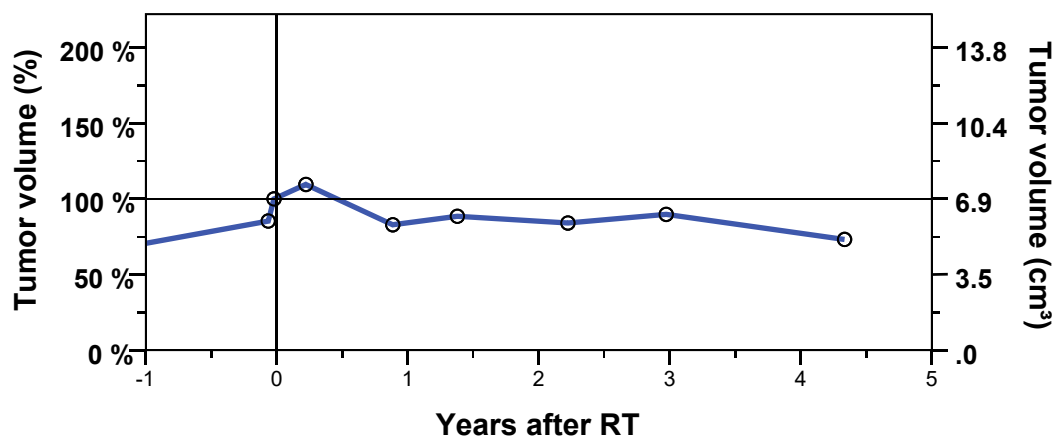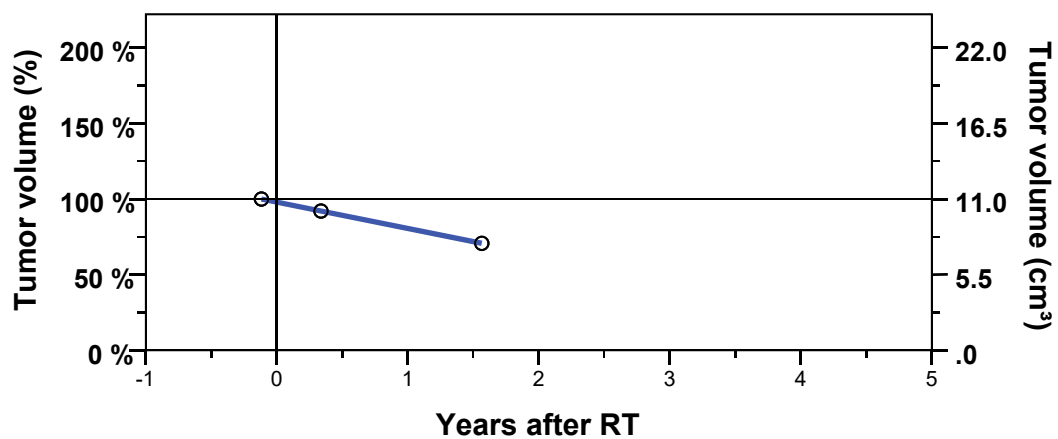

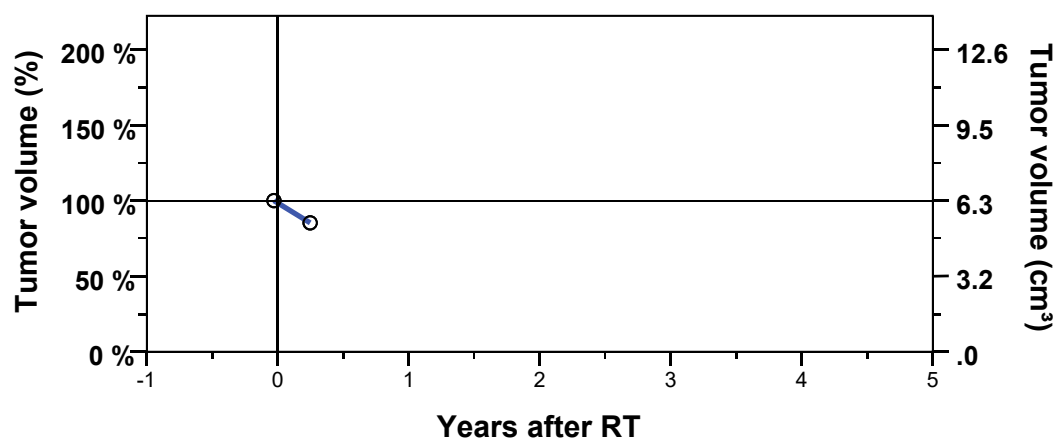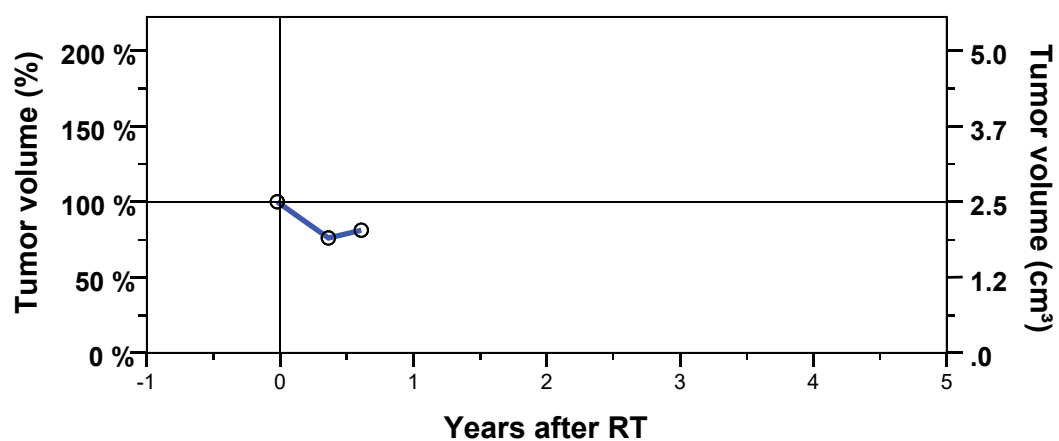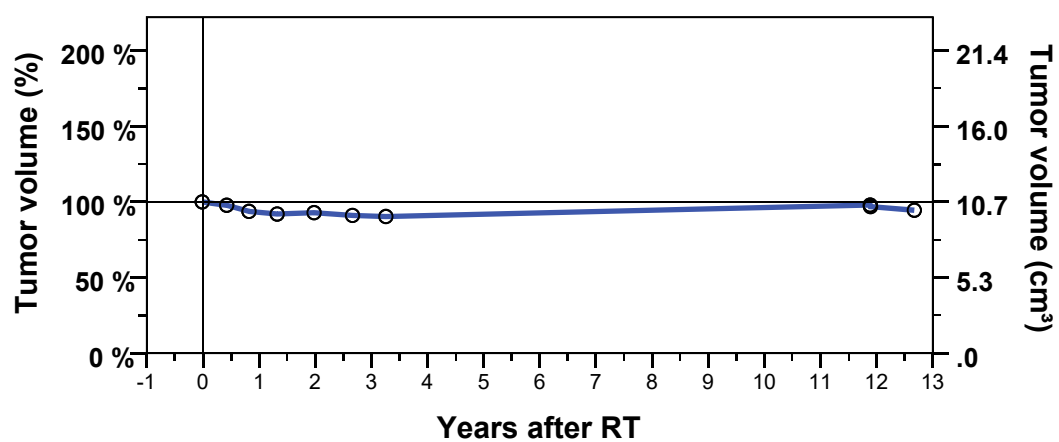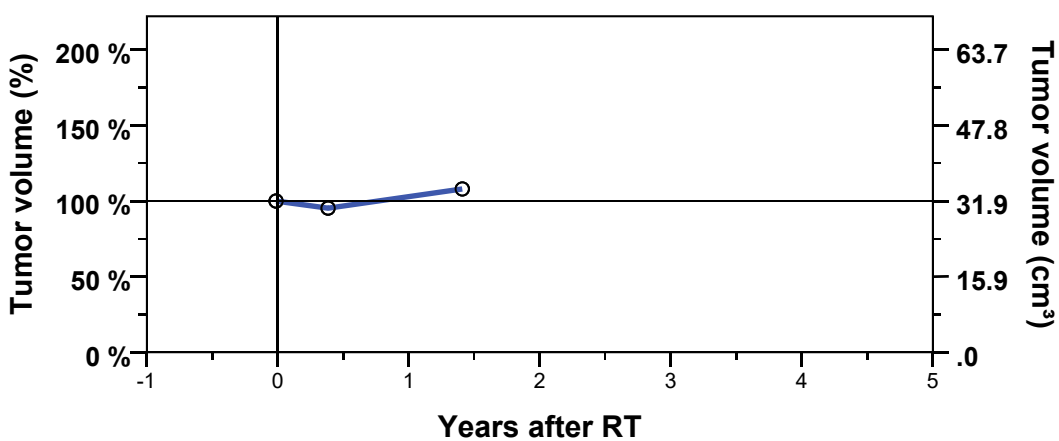

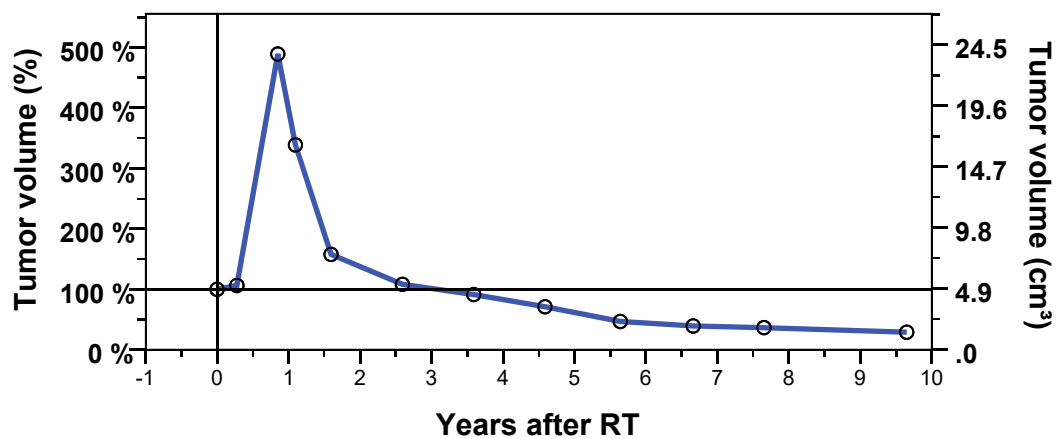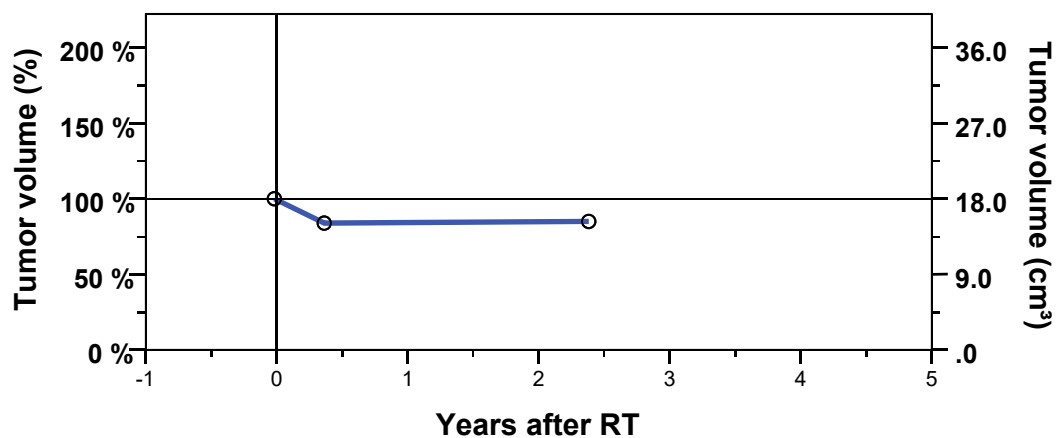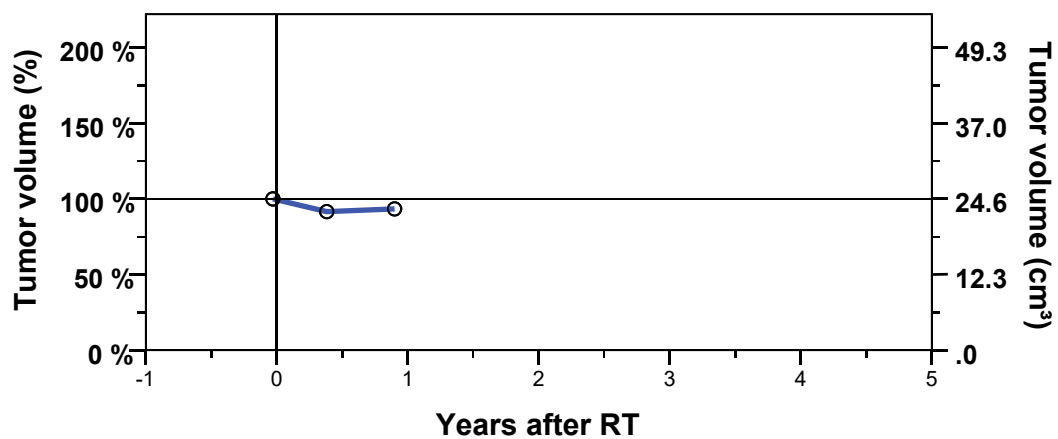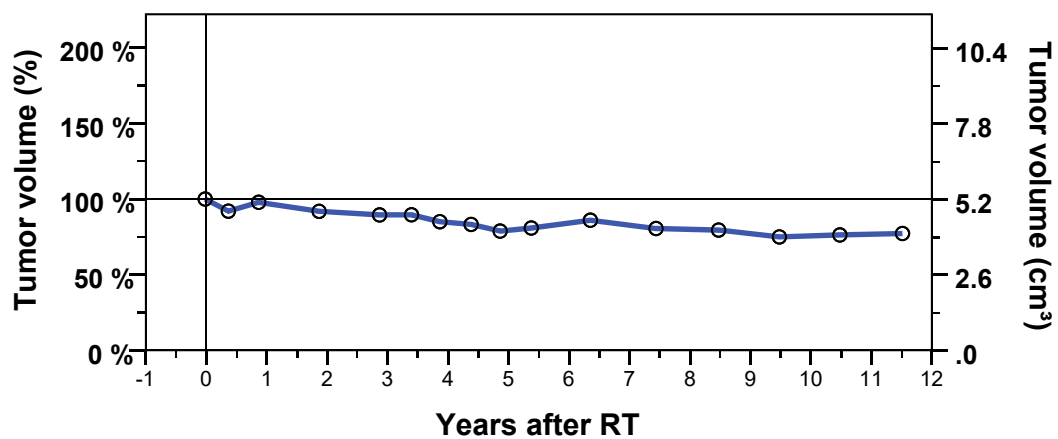

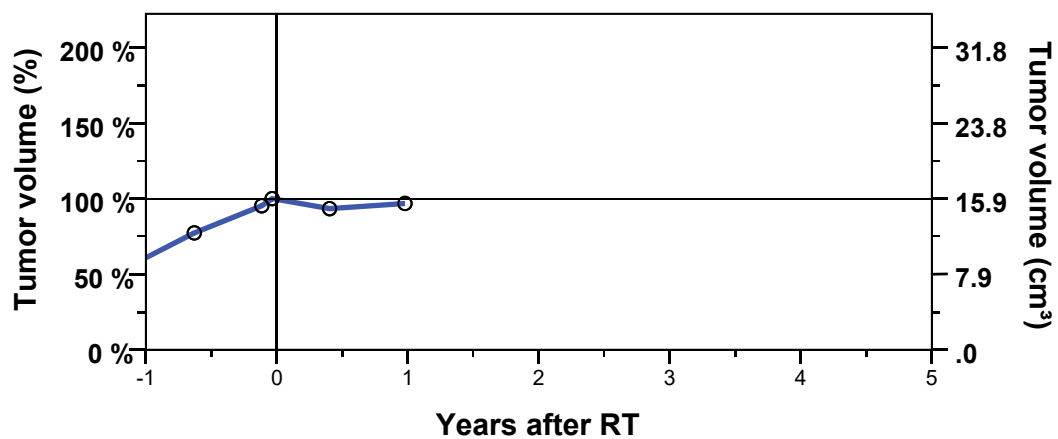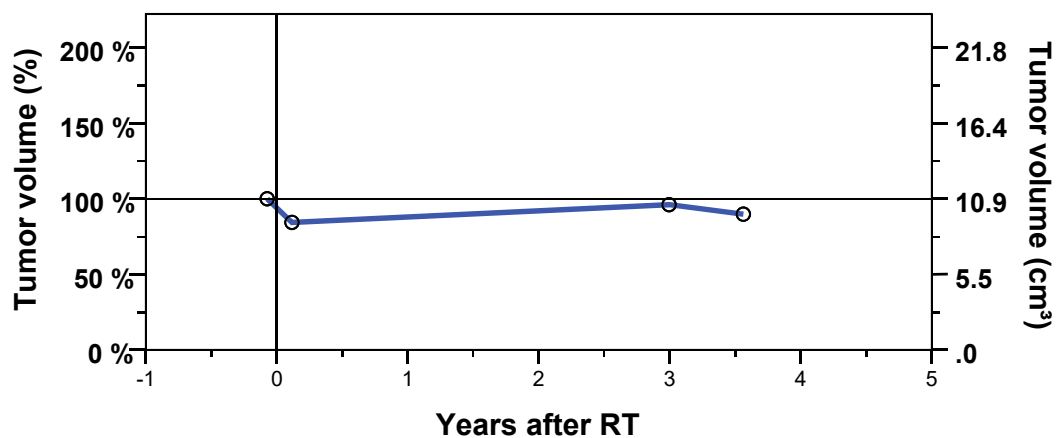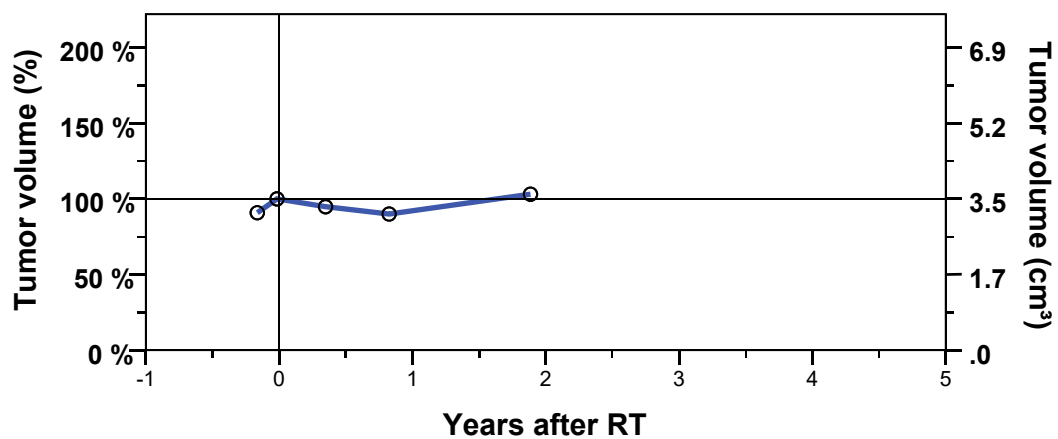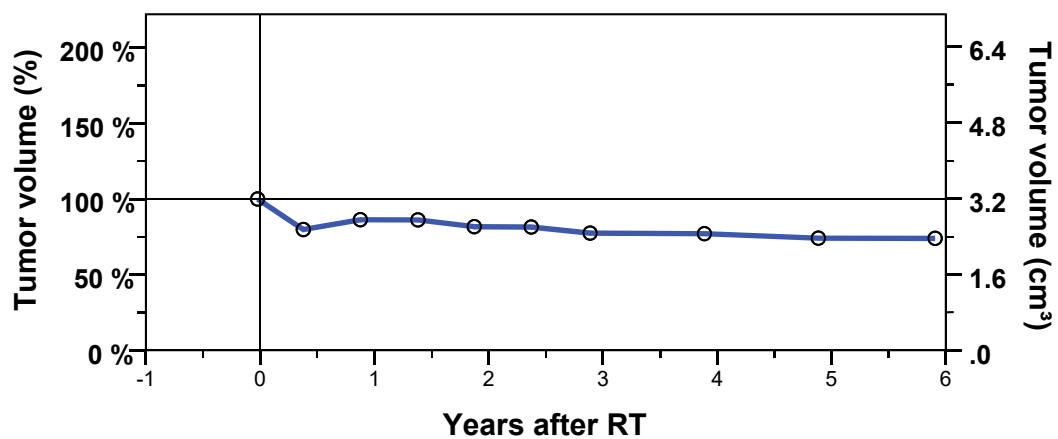



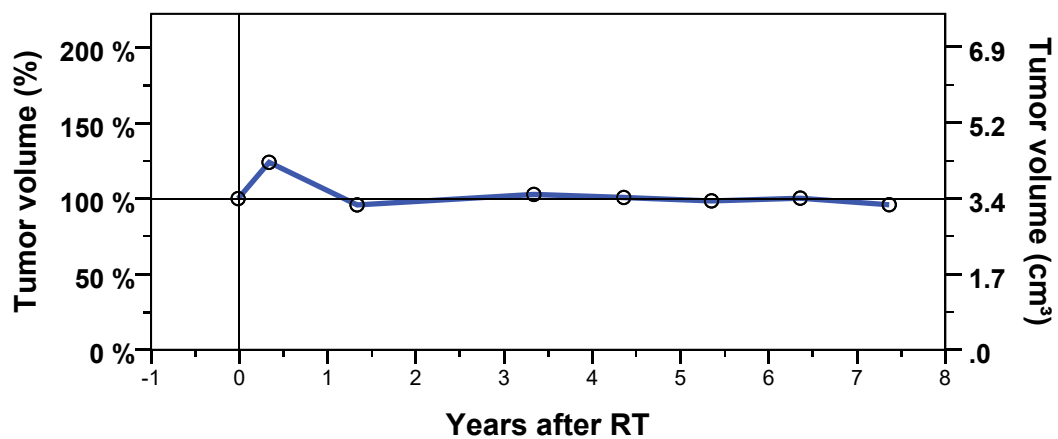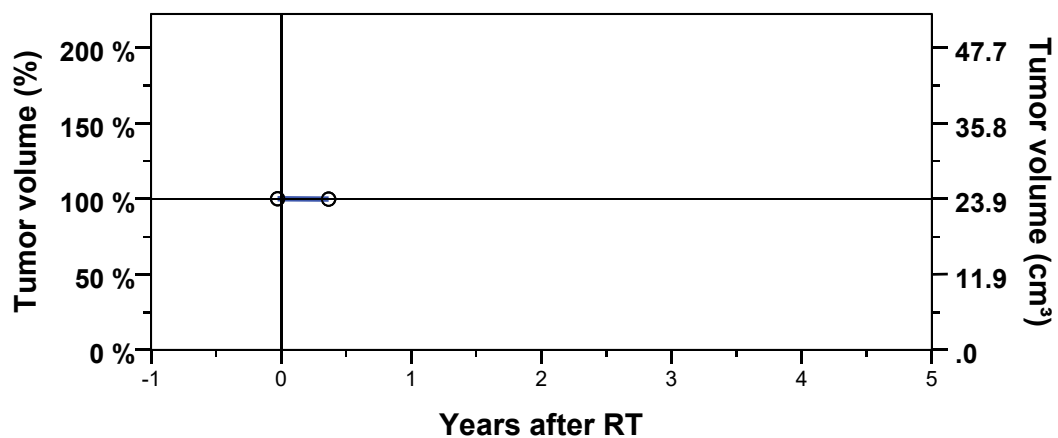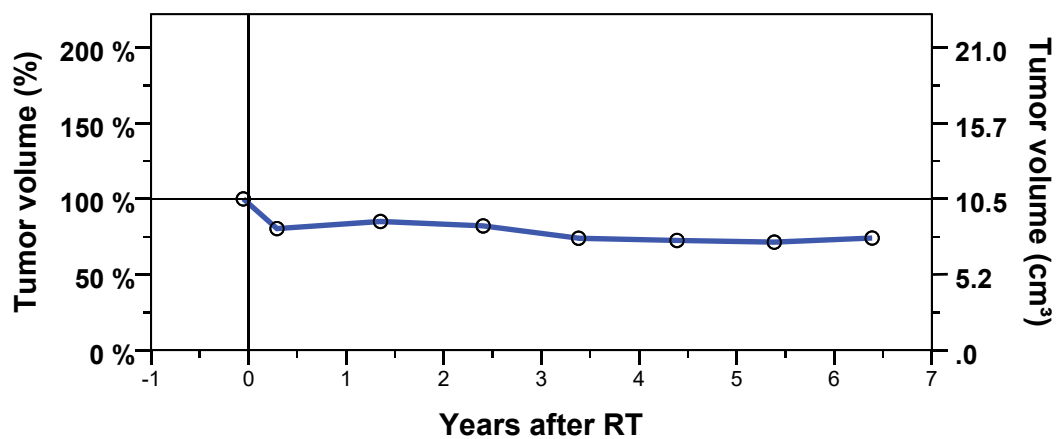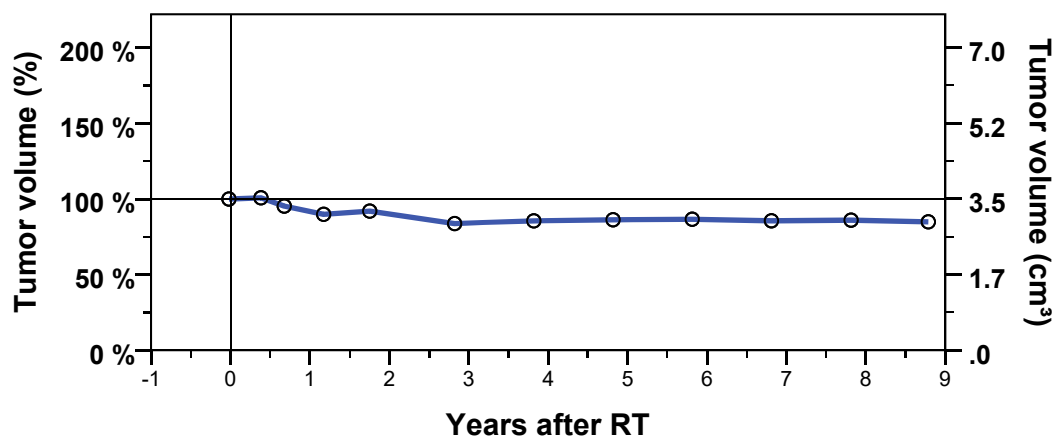

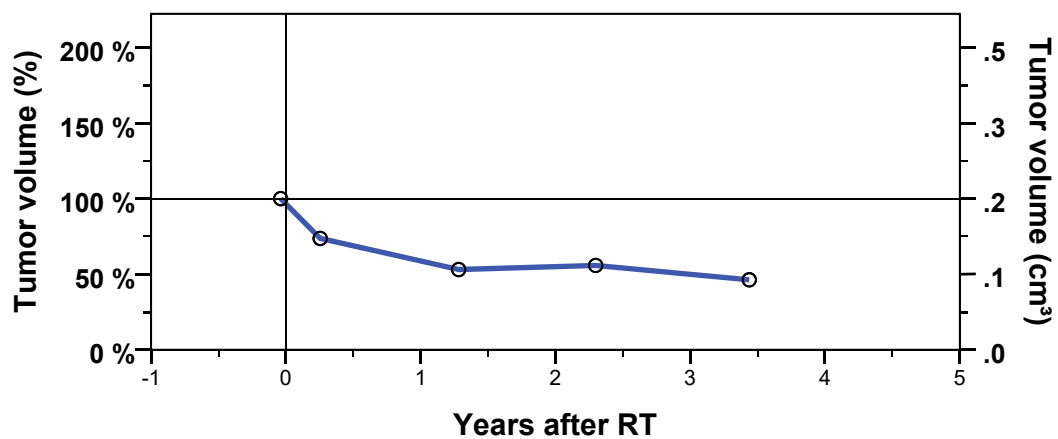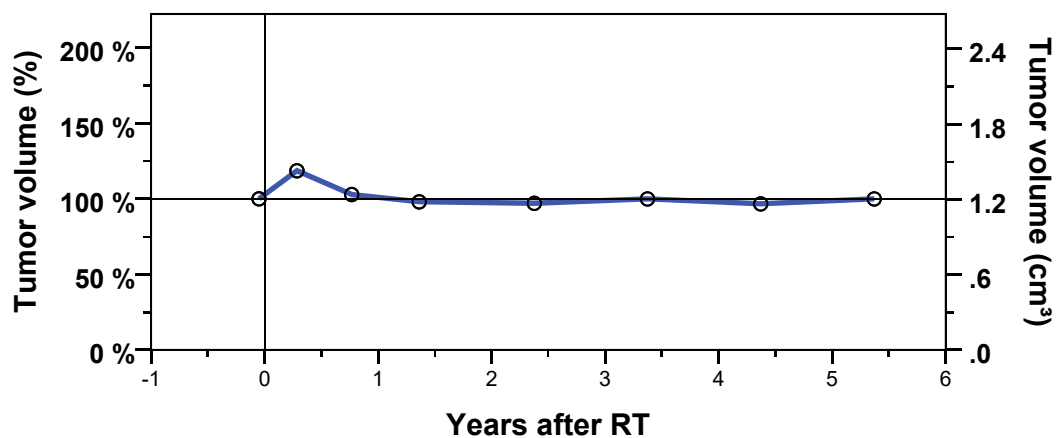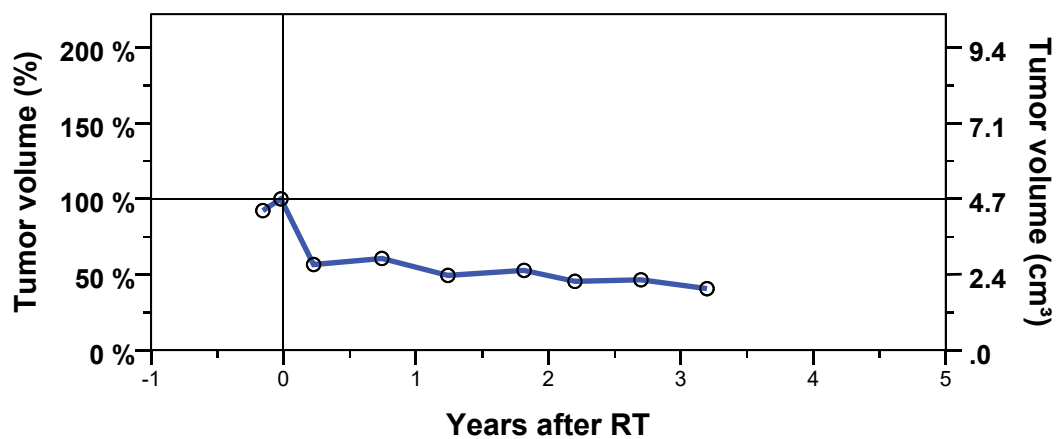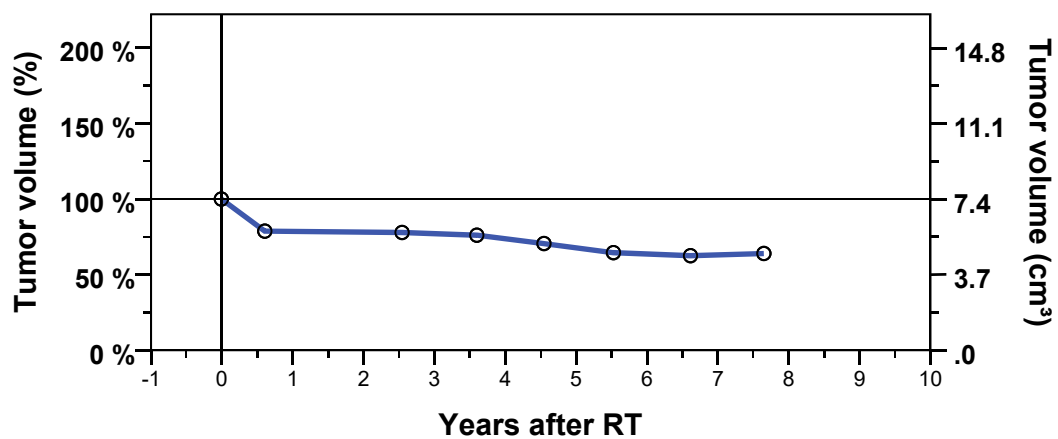

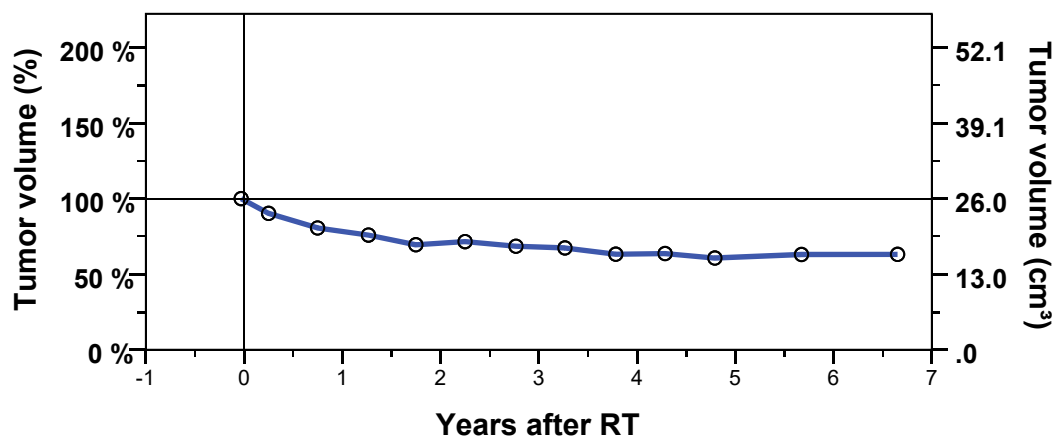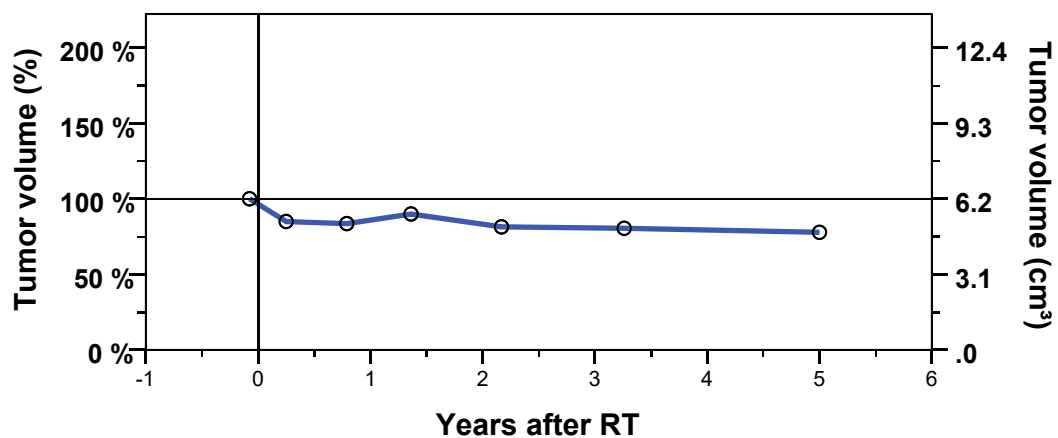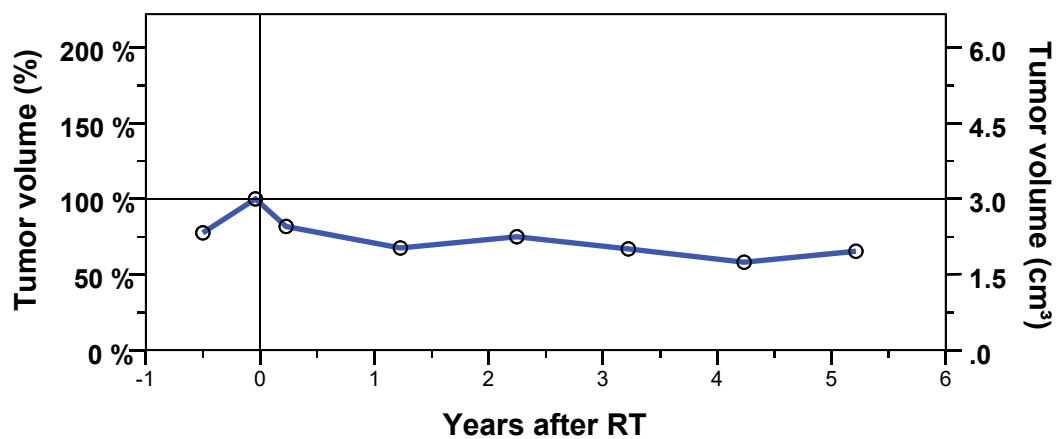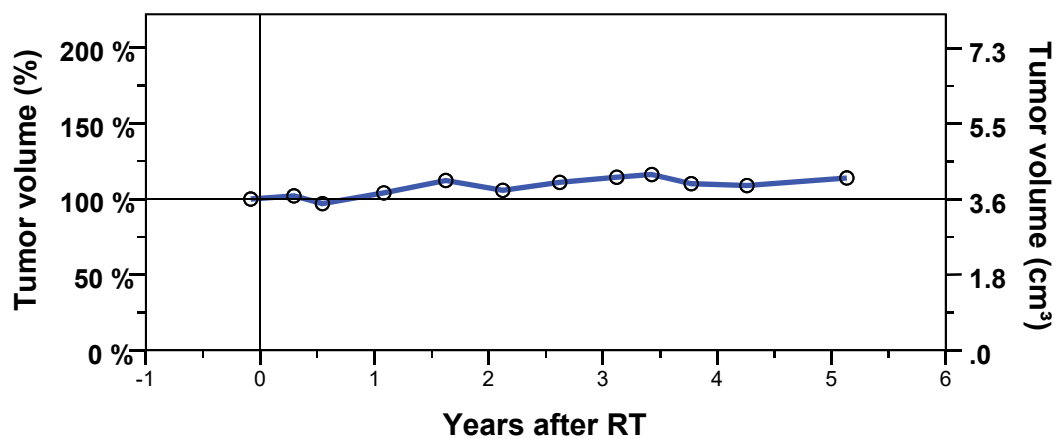

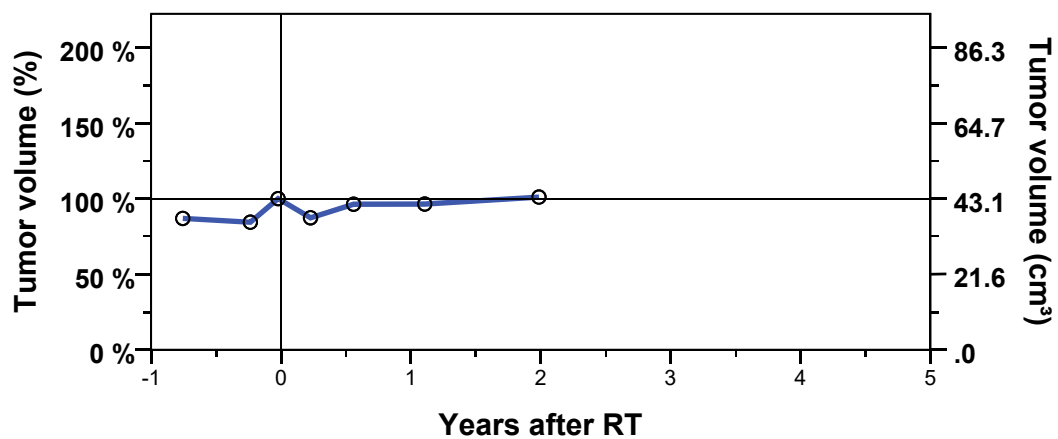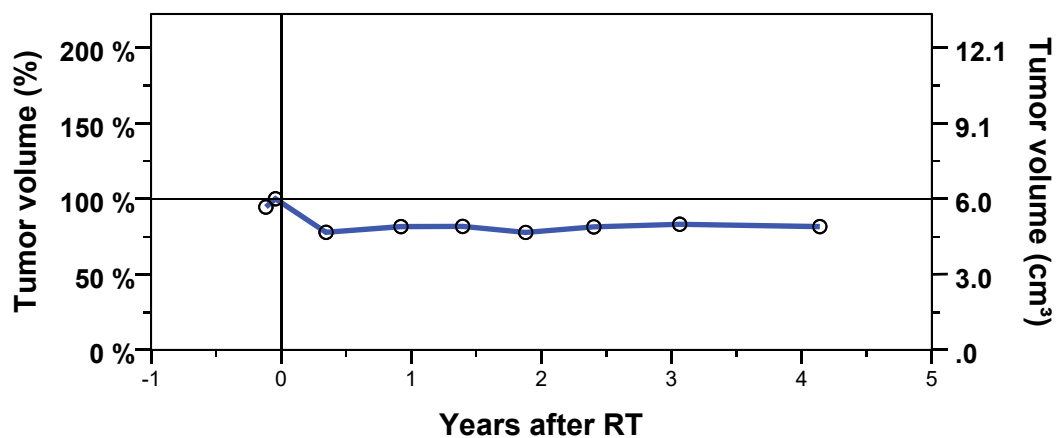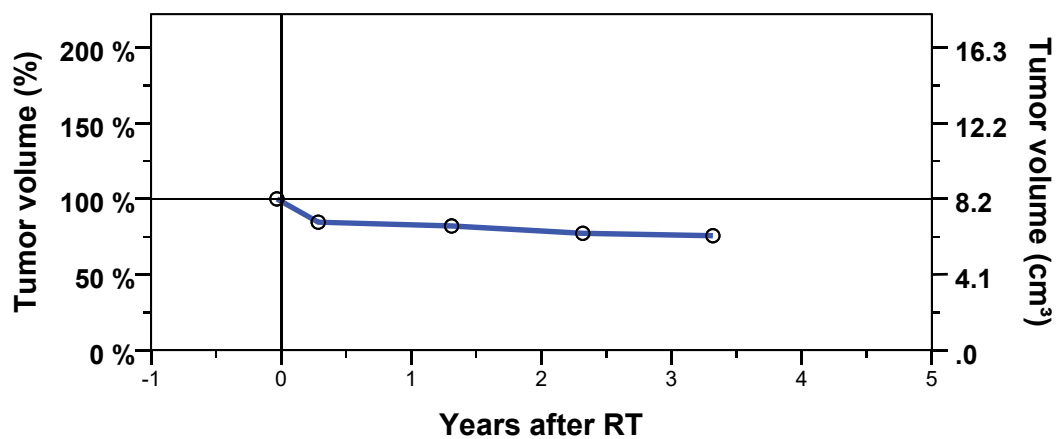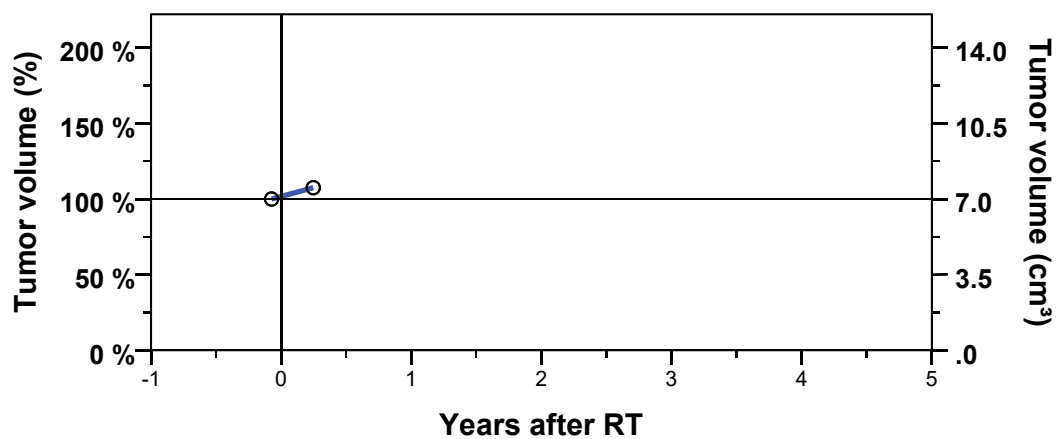

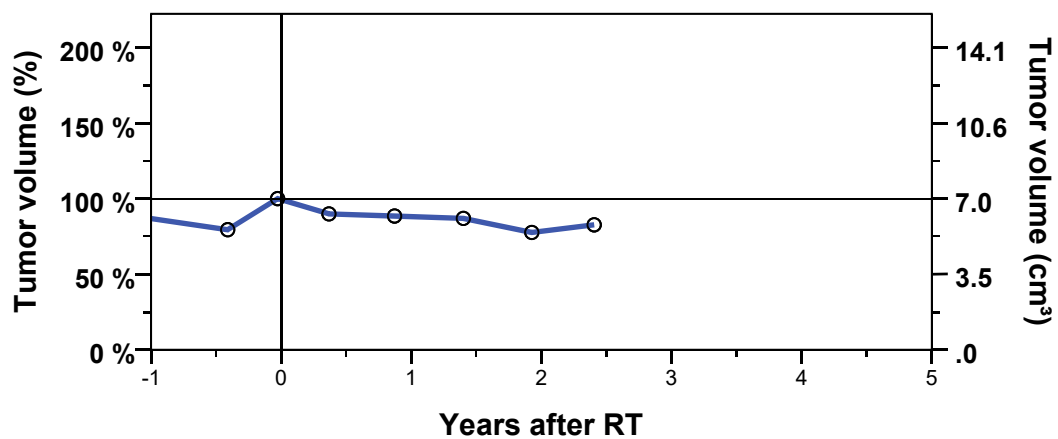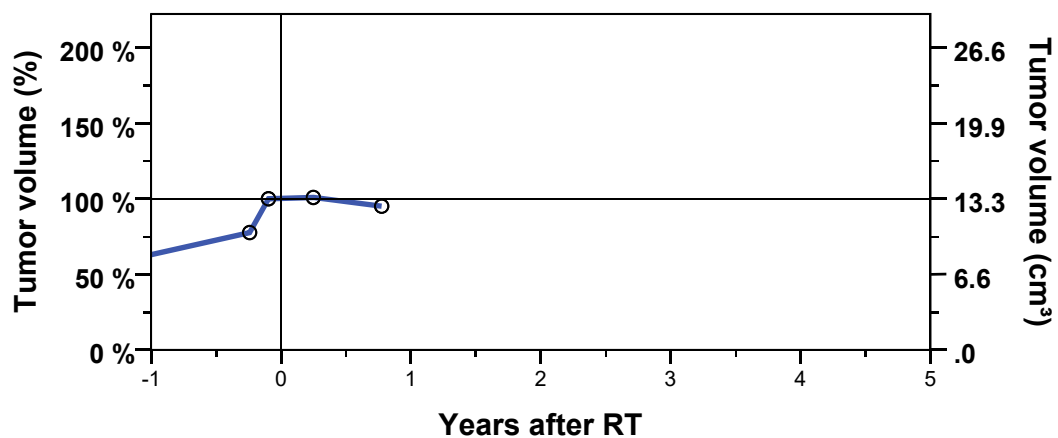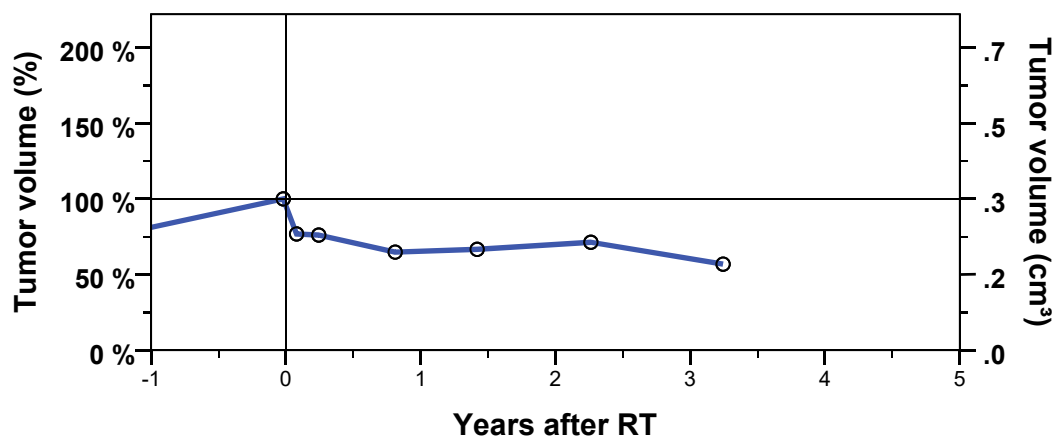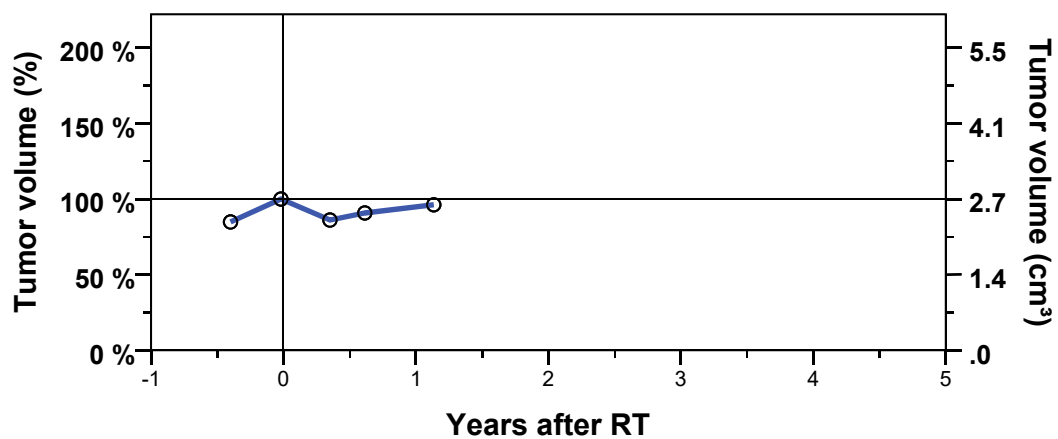

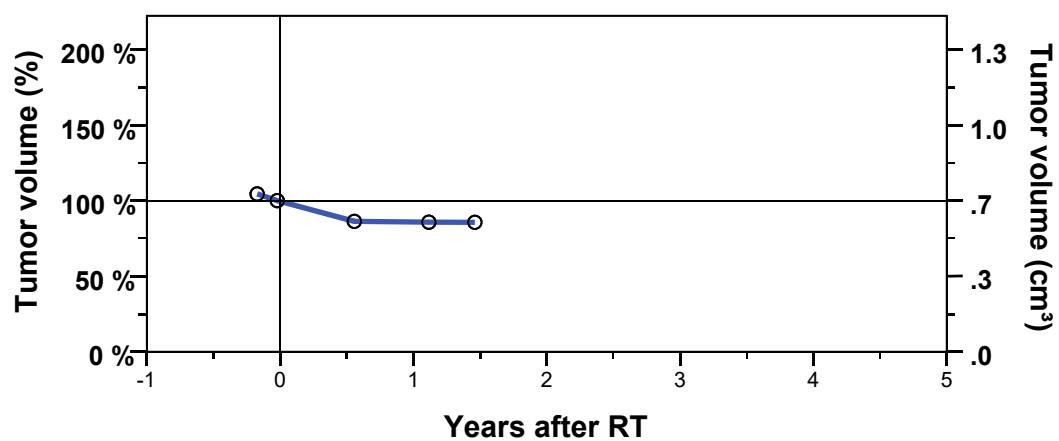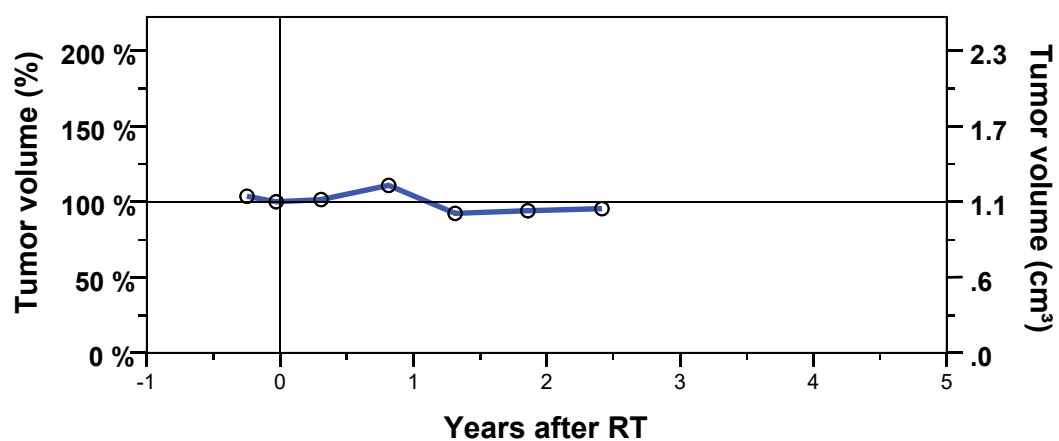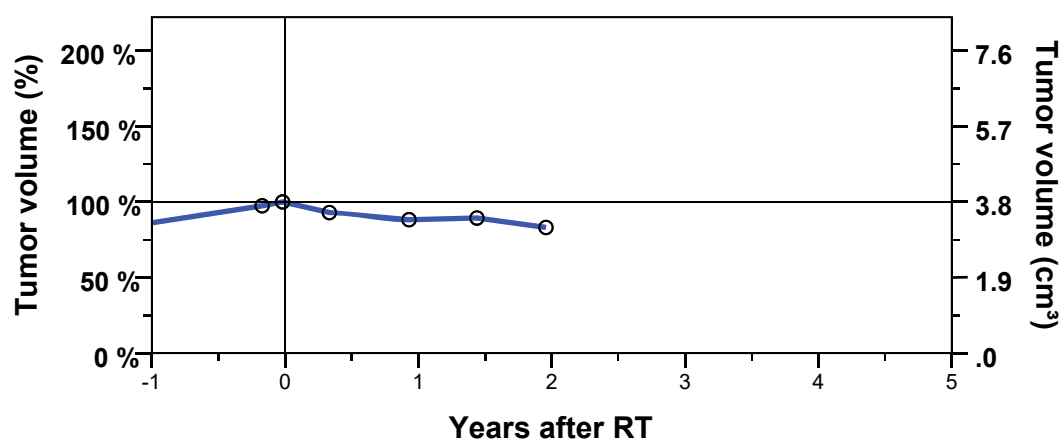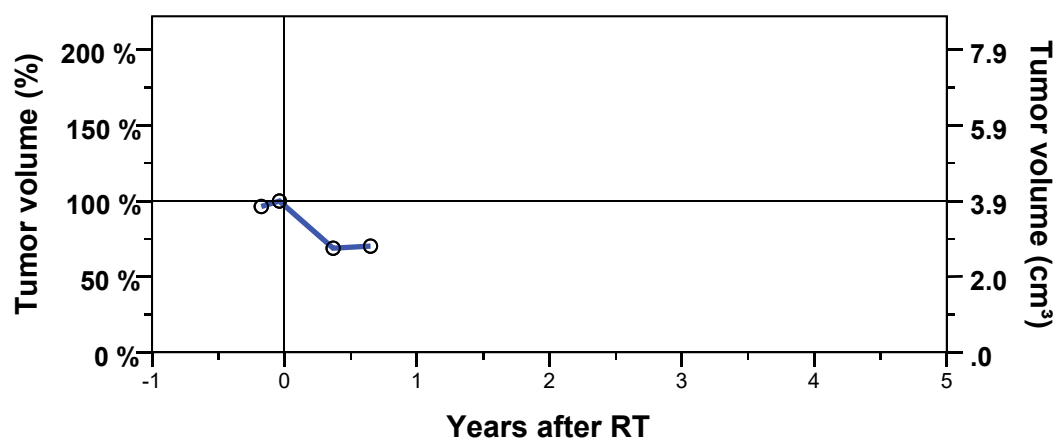

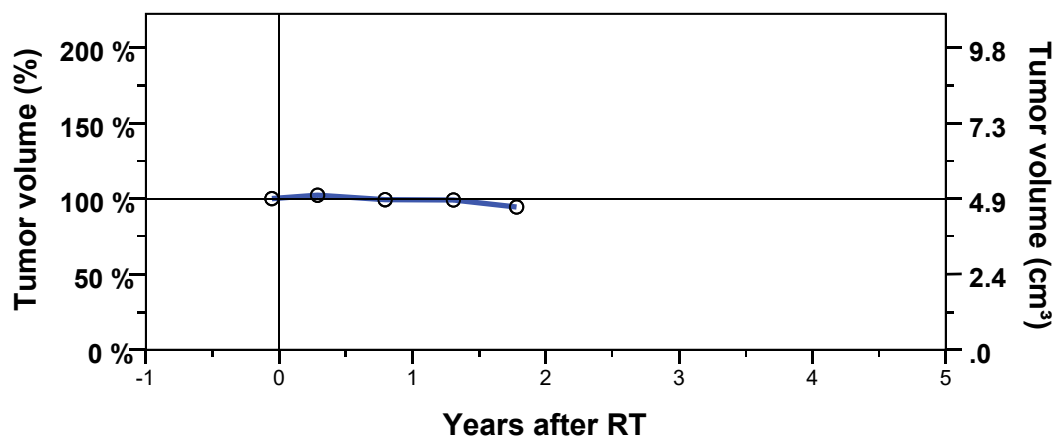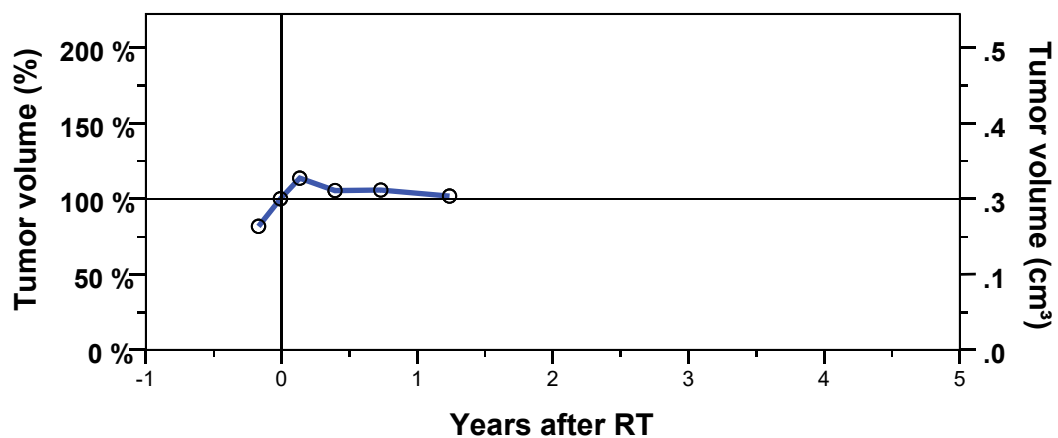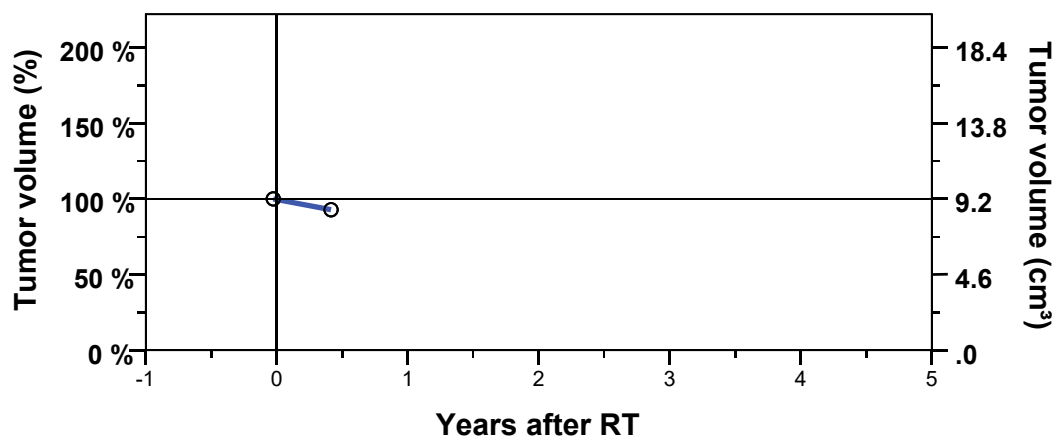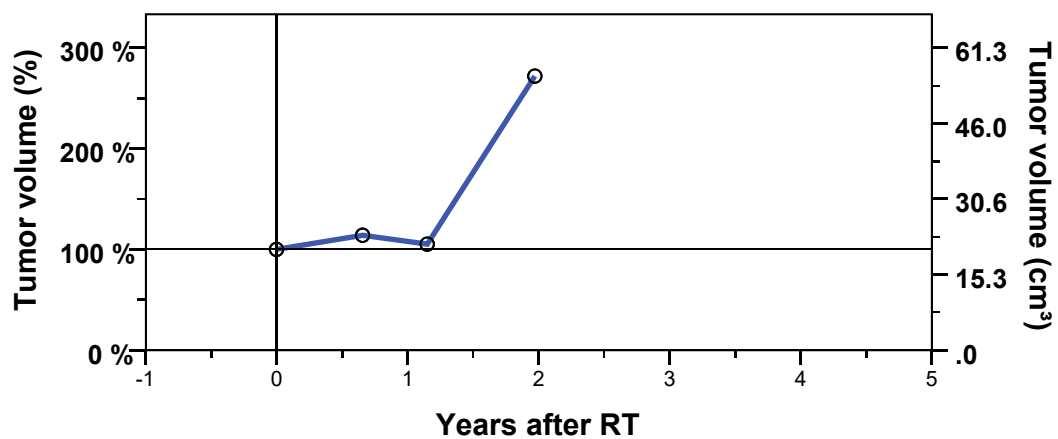

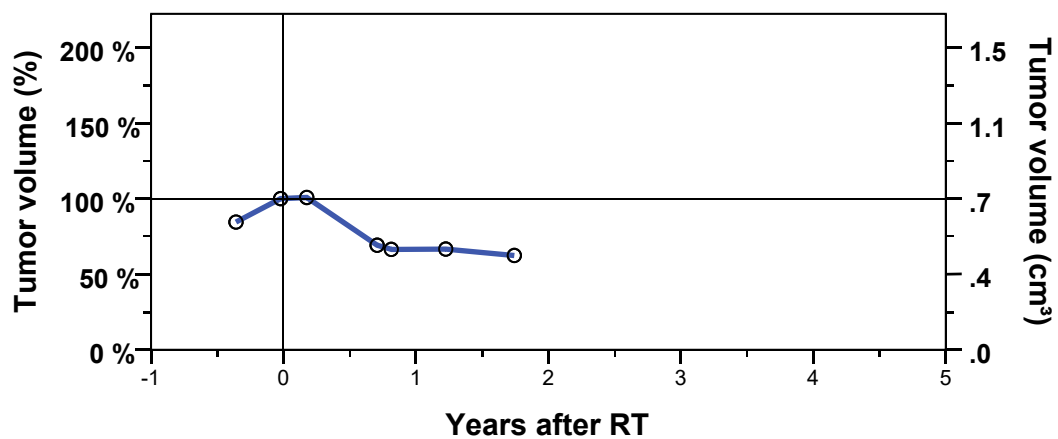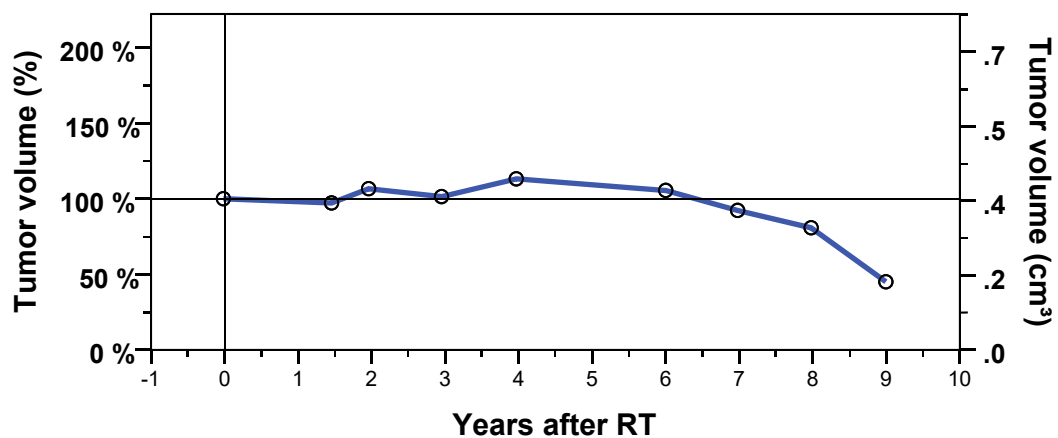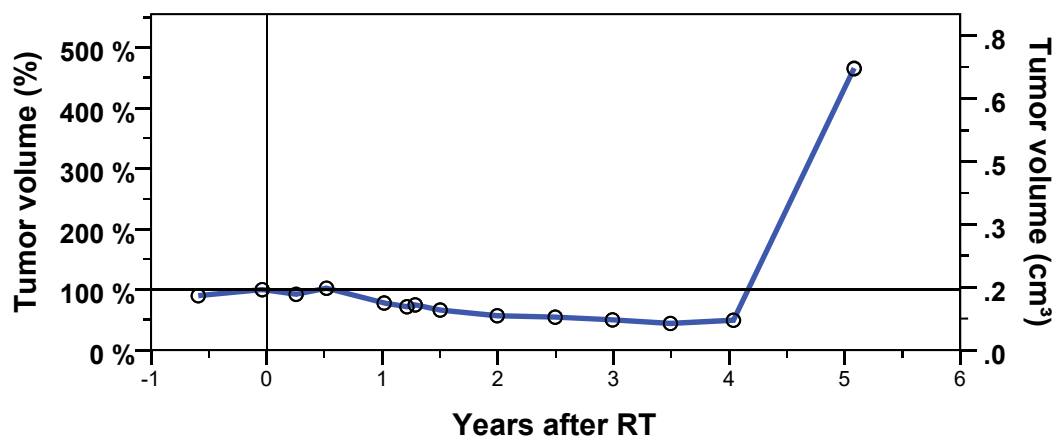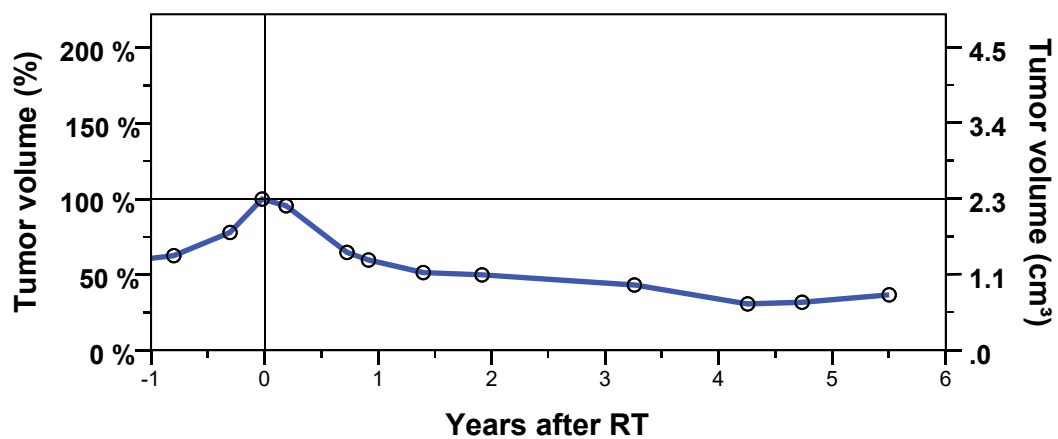



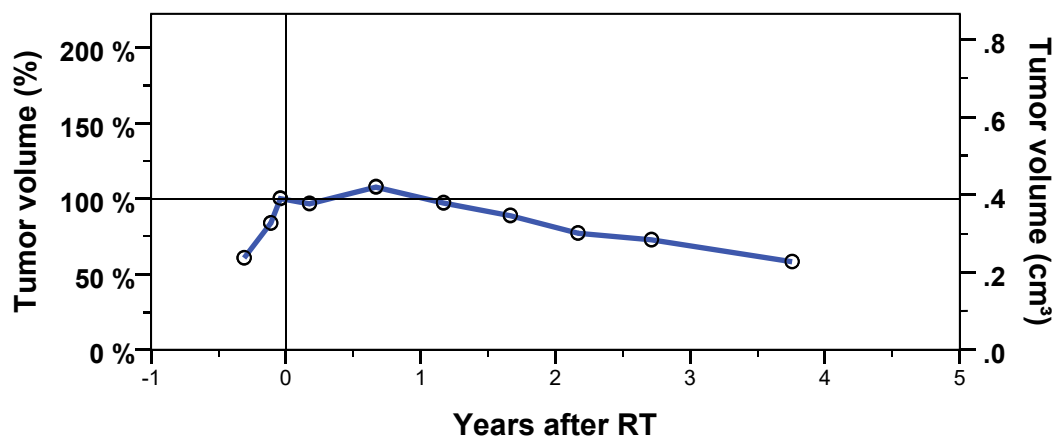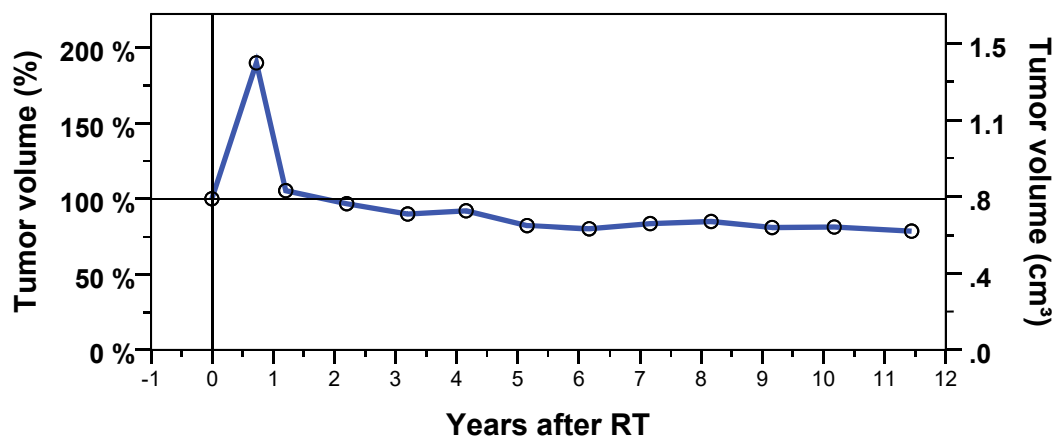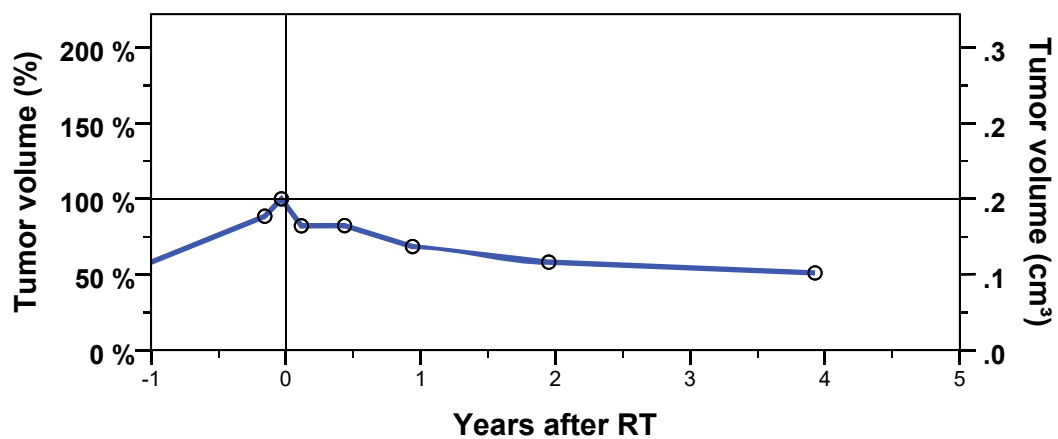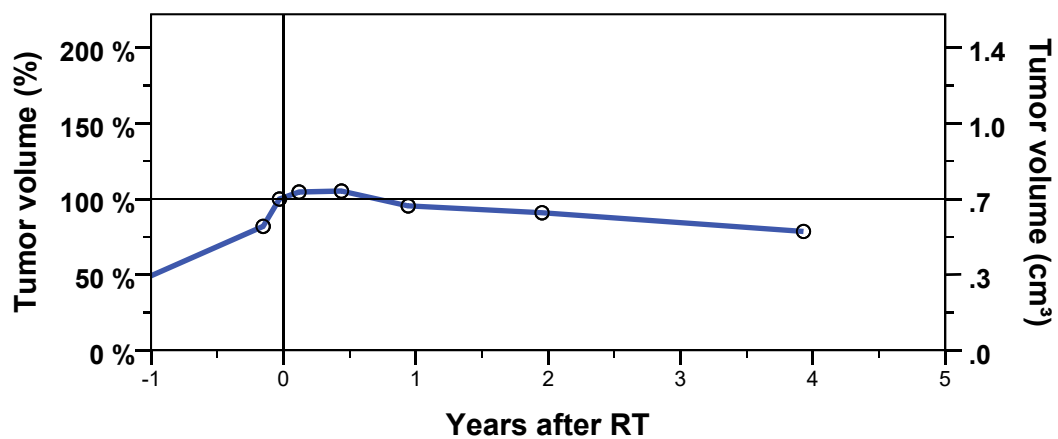

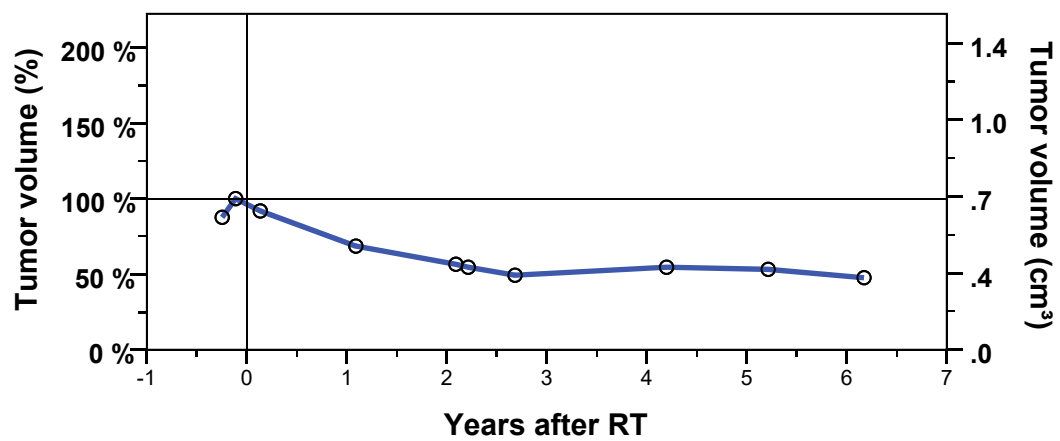

Supplement: s1 [file s1]
